# Supplementary material
Source: publisher site journal article supplement (https://www.dovepress.com/article/393284)
Supplement: Supplementary file 1 [file get_supplementary_file.php]

**Supplementary Material**

Supplementary Table S1. Subgroup analysis by gender for association between smoking exposure and Ulcerative colitis

| Factor | Level | Males OR (95% CI) *a* | p-value | Females OR (95% CI) *a* | p-value |
| --- | --- | --- | --- | --- | --- |
| Childhood Passive Smoking | No | Base | Base | Base | Base |
| Yes | 0.83 (0.47 – 1.45) | 0.504 | 0.87 (0.56 – 1.35) | 0.542 |
| Adulthood  Smoking status | Never | Base | Base | Base | Base |
| Former | 0.79 (0.30 – 2.07) | 0.638 | 1.12 (0.53 – 2.34) | 0.773 |
| Current | 1.43 (0.71 – 2.87) | 0.317 | 1.00 (0.61 – 1.66) | 0.985 |
| Ever Smoked | No | Base | Base | Base | Base |
| Yes | 1.20 (0.66 – 2.18) | 0.544 | 1.05 (0.68 – 1.63) | 0.814 |

**Notes:** *a Adjusted for nationality, and income*

Supplementary Table S2. Subgroup analysis by gender of association between smoking exposure and Crohn’s disease

| Factor | Level | Males OR (95% CI) *a* | p-value | Females OR (95% CI) *a* | p-value |
| --- | --- | --- | --- | --- | --- |
| Childhood Passive Smoking | No | Base | Base | Base | Base |
| Yes | 0.43 (0.14 – 1.28) | 0.128 | 8.23 (1.36 – 49.66) | 0.021 |
| Adulthood  Smoking status | Never | Base | Base | Base | Base |
| Former | 0.63 (0.11 – 3.66) | 0.610 | 0.95 (0.11 – 8.47) | 0.962 |
| Current | 1.27 (0.34 – 4.70) | 0.725 | 42.71 (1.17 – 1559.57) | 0.041 |
| Ever Smoked | No | Base | Base | Base | Base |
| Yes | 1.26 (0.44 – 3.63) | 0.665 | 2.23 (0.54 – 9.22) | 0.268 |

**Notes:** *a Adjusted for nationality, income, and education*
